# Supplementary material
Source: publisher figshare collection journal article supplement (https://rs.figshare.com/ndownloader/files/14658902)
Supplement: Supplementary file 1 [file 14658902]

## Electronic Supplementary Material

### The population density of an urban scavenging predator is inextricably tied to human cultural practices

Nishant Kumar, Urvi Gupta, Harsha Malhotra, Yadvendradev V. Jhala, Qamar Qureshi, Andrew G. Gosler, Fabrizio Sergio  
*Proceedings of the Royal Society Series B*

DOI: 10.1098/rspb.2018.2932

**Table S1.** Landscape and human variables used to characterize each study plot in which we surveyed the population density of Black kite breeding pairs within the city of Delhi (India). Variables were chosen on the basis of our knowledge of kite ecology and of previous analyses of the factors that affect habitat preferences, breeding success and behavioural performance by Delhi kites (Kumar et al. 2018a,b, 2019). These variables characterized each plot in terms of its landscape structure, food availability (local availability of organic garbage, access to Muslim ritual-subsidies, local density of humans walking in the streets), and nest-site availability. See the Study Area section for background details on the rationale underlying the choice of indicators of human refuse and ritual subsidies. Further in-depth details can be found in Kumar et al. (2018a: Online Resource 2).

| Variable               | Description                                                                                                                                                                                                                                                                                                                                                                                                                                                                                                                                                                                                                                                                                                                                                                                                                                                                                                                                                                                                                                                                                                                                                                                  |
|------------------------|----------------------------------------------------------------------------------------------------------------------------------------------------------------------------------------------------------------------------------------------------------------------------------------------------------------------------------------------------------------------------------------------------------------------------------------------------------------------------------------------------------------------------------------------------------------------------------------------------------------------------------------------------------------------------------------------------------------------------------------------------------------------------------------------------------------------------------------------------------------------------------------------------------------------------------------------------------------------------------------------------------------------------------------------------------------------------------------------------------------------------------------------------------------------------------------------|
| Nest-site availability | Density (number/km <sup>2</sup> ) of structures potentially capable to support a kite nest, such as trees of sufficient height, or anthropogenic structures such as pylons and towers (Kumar et al. 2018a). For each plot, we: (1) digitized all large-enough trees clearly visible in Google Earth imagery; (2) visited each plot and mapped any additional trees that were not well visible in Google Earth (e.g. because of low quality, blurred imagery for some sectors of Delhi, or because of the shadow produced by tall buildings) and all potential anthropogenic nest-structures (e.g. poles, towers) that were typically too difficult to detect in Google Earth. For plots in which nesting-structures were too many to count individually, we: (1) plotted 20 random locations within each plot; (2) visited them in the field and counted all nesting-structures observed in a circular buffer of 200 m radius centered on each of these 20 random locations to calculate a cumulative density of nesting structures/km <sup>2</sup> . Because more than 90 % of the available nest-structures were trees, we summed trees and artificial structures into a single cumulative |

estimate of breeding-site availability.

|                            |                                                                                                                                                                                                                                                                                                                                                                                                                                                                                                                                                                                                                                                                                                                                                                                                                                                                                                                                                                                                                                                                                                                                                                                                                                                                                                                                                                                                                                                                                                                                                                                                                                                                                                                              |
|----------------------------|------------------------------------------------------------------------------------------------------------------------------------------------------------------------------------------------------------------------------------------------------------------------------------------------------------------------------------------------------------------------------------------------------------------------------------------------------------------------------------------------------------------------------------------------------------------------------------------------------------------------------------------------------------------------------------------------------------------------------------------------------------------------------------------------------------------------------------------------------------------------------------------------------------------------------------------------------------------------------------------------------------------------------------------------------------------------------------------------------------------------------------------------------------------------------------------------------------------------------------------------------------------------------------------------------------------------------------------------------------------------------------------------------------------------------------------------------------------------------------------------------------------------------------------------------------------------------------------------------------------------------------------------------------------------------------------------------------------------------|
| Refuse availability score  | Level of sanitation of the plot: 1 = clean areas (efficient waste disposal with very scarce or no organic refuse in the streets); 2 = areas under poor waste management regime (abundant and widespread refuse in the streets throughout the area, either in small frequent piles, in illegal ephemeral dumps, or as individual items scattered a bit of everywhere through all streets).                                                                                                                                                                                                                                                                                                                                                                                                                                                                                                                                                                                                                                                                                                                                                                                                                                                                                                                                                                                                                                                                                                                                                                                                                                                                                                                                    |
| Human density              | Average number of people walking within 2m of a stationary observer during 5 min at 10 locations randomly plotted within 200 m of a nest, and averaged over all nests censused in a plot. When no or few nests were present in a plot, we conducted the human counts at five sites randomly distributed within the plot. Counts were only operated between 10:00-17:00 hrs and avoided during atypical, momentary peak periods of human traffic, such as exits from work or schools, in order to maintain consistency across sites (following Kumar et al. 2018a).                                                                                                                                                                                                                                                                                                                                                                                                                                                                                                                                                                                                                                                                                                                                                                                                                                                                                                                                                                                                                                                                                                                                                           |
| Access to Muslim subsidies | First component (PC1) of a principal component analysis on the density of Muslim inhabitants in the plot and on the proximity of the plot to the three closest Muslim colonies. A key variable in our previous analyses on the predictors of kite site selection, occupancy, breeding and behavioral performance was the ease of access to dense Muslim colonies, which provide abundant food supplies in the form of ritual subsidies (Kumar et al. 2018a, b). More specifically, we previously showed that Delhi kites preferred breeding sites closer than available to the 1st, 2nd and 3rd nearest Muslim colony (see Kumar et al. 2018a for details). Thus, to provide a comprehensive measure that integrated the proximity to the three nearest Muslim colonies with their human population density (under the assumption that higher rates of refuse and ritualized-feeding should occur in more densely-populated Muslim colonies), we extracted the first axis (PC1) of a Principal Component Analysis (PCA) run on these four aforementioned variables. Its PC1 (hereafter “access to Muslim subsidies”) explained 83% of the variance and had a high positive loading on Muslim population density and high negative loadings on the distance to the 1st, 2nd and 3rd closest Muslim colonies. Thus, it provided an increasing index of access to abundant “Muslim subsidies”. For clarity of presentation (e.g. in graphs), we added 1.63 to all values of this variable in order to avoid negative values. Finally, one plot with an unusually large negative value was rescaled to the closest value in order not to distort the graphs. Analyses with the original or rescaled value gave the same results. |
| Index of road density      | Number of asphalted roads crossed by a 500 m north-south and a 500 m east-west transect crossing each other on a nest, and averaged over all nests censused in a plot.                                                                                                                                                                                                                                                                                                                                                                                                                                                                                                                                                                                                                                                                                                                                                                                                                                                                                                                                                                                                                                                                                                                                                                                                                                                                                                                                                                                                                                                                                                                                                       |

**Table S2.** Information on the population density of Black kites and its predictor variables collected at 28 study plots randomly scattered within Delhi (India). Variables names correspond to those of Table S1, which reports a description of each variable. The four columns on the right (density of Muslim inhabitants; distance to closest Muslim colony; distance to 2nd closest Muslim colony; distance to 3rd closest Muslim colony) report the variables used to build the PC1 index of “access to Muslim subsidies” (details in Table S1).

| Plot ID | Year | density | nest-site availability | refuse availability score | human density | index of road density | access to Muslim subsidies | density of Muslim inhabitants | distance to closest Muslim colony | distance to 2nd closest Muslim colony | distance to 3rd closest Muslim colony |
|---------|------|---------|------------------------|---------------------------|---------------|-----------------------|----------------------------|-------------------------------|-----------------------------------|---------------------------------------|---------------------------------------|
| 2       | 2013 | 67.09   | 2198.40                | 1                         | 13.88         | 9.23                  | 2.07                       | 20307                         | 885                               | 1085                                  | 2071                                  |
| 2       | 2014 | 64.29   | 2198.40                | 1                         | 13.88         | 9.23                  | 2.07                       | 20307                         | 885                               | 1085                                  | 2071                                  |
| 2       | 2015 | 72.28   | 2198.40                | 1                         | 13.88         | 9.23                  | 2.07                       | 20307                         | 885                               | 1085                                  | 2071                                  |
| 2       | 2016 | 63.34   | 2198.40                | 1                         | 13.88         | 9.23                  | 2.07                       | 20307                         | 885                               | 1085                                  | 2071                                  |
| 2       | 2017 | 46.00   | 2198.40                | 1                         | 13.88         | 9.23                  | 2.07                       | 20307                         | 885                               | 1085                                  | 2071                                  |
| 2       | 2018 | 58.00   | 2198.40                | 1                         | 13.88         | 9.23                  | 2.07                       | 20307                         | 885                               | 1085                                  | 2071                                  |
| 7       | 2013 | 87.04   | 3161.60                | 1                         | 17.68         | 6.61                  | 2.96                       | 70009                         | 245                               | 1170                                  | 1196                                  |
| 7       | 2014 | 118.34  | 3161.60                | 1                         | 17.68         | 6.61                  | 2.96                       | 70009                         | 245                               | 1170                                  | 1196                                  |
| 7       | 2015 | 109.30  | 3161.60                | 1                         | 17.68         | 6.61                  | 2.96                       | 70009                         | 245                               | 1170                                  | 1196                                  |
| 7       | 2016 | 109.23  | 3161.60                | 1                         | 17.68         | 6.61                  | 2.96                       | 70009                         | 245                               | 1170                                  | 1196                                  |
| 7       | 2017 | 104.62  | 3161.60                | 1                         | 17.68         | 6.61                  | 2.96                       | 70009                         | 245                               | 1170                                  | 1196                                  |
| 7       | 2018 | 110.77  | 3161.60                | 1                         | 17.68         | 6.61                  | 2.96                       | 70009                         | 245                               | 1170                                  | 1196                                  |
| 6       | 2013 | 5.00    | 953.54                 | 1                         | 2.34          | 3.29                  | 1.80                       | 2412                          | 695                               | 1843                                  | 1858                                  |
| 6       | 2014 | 2.25    | 953.54                 | 1                         | 2.34          | 3.29                  | 1.80                       | 2412                          | 695                               | 1843                                  | 1858                                  |
| 6       | 2015 | 4.71    | 953.54                 | 1                         | 2.34          | 3.29                  | 1.80                       | 2412                          | 695                               | 1843                                  | 1858                                  |
| 6       | 2016 | 4.35    | 953.54                 | 1                         | 2.34          | 3.29                  | 1.80                       | 2412                          | 695                               | 1843                                  | 1858                                  |
| 6       | 2017 | 5.34    | 953.54                 | 1                         | 2.34          | 3.29                  | 1.80                       | 2412                          | 695                               | 1843                                  | 1858                                  |
| 6       | 2018 | 5.00    | 953.54                 | 1                         | 2.34          | 3.29                  | 1.80                       | 2412                          | 695                               | 1843                                  | 1858                                  |
| 4       | 2013 | 4.81    | 336.06                 | 1                         | 4.05          | 2.46                  | 0.99                       | 8579                          | 2226                              | 2794                                  | 2816                                  |
| 4       | 2014 | 6.59    | 336.06                 | 1                         | 4.05          | 2.46                  | 0.99                       | 8579                          | 2226                              | 2794                                  | 2816                                  |
| 4       | 2015 | 5.60    | 336.06                 | 1                         | 4.05          | 2.46                  | 0.99                       | 8579                          | 2226                              | 2794                                  | 2816                                  |
| 4       | 2016 | 4.67    | 336.06                 | 1                         | 4.05          | 2.46                  | 0.99                       | 8579                          | 2226                              | 2794                                  | 2816                                  |

|    |      |      |         |   |       |      |      |       |      |      |      |
|----|------|------|---------|---|-------|------|------|-------|------|------|------|
| 4  | 2017 | 5.34 | 336.06  | 1 | 4.05  | 2.46 | 0.99 | 8579  | 2226 | 2794 | 2816 |
| 4  | 2018 | 4.67 | 336.06  | 1 | 4.05  | 2.46 | 0.99 | 8579  | 2226 | 2794 | 2816 |
| 5  | 2013 | 4.33 | 164.32  | 2 | 16.09 | 4.25 | 0.66 | 4902  | 1877 | 3639 | 3708 |
| 5  | 2014 | 2.78 | 164.32  | 2 | 16.09 | 4.25 | 0.66 | 4902  | 1877 | 3639 | 3708 |
| 5  | 2015 | 3.51 | 164.32  | 2 | 16.09 | 4.25 | 0.66 | 4902  | 1877 | 3639 | 3708 |
| 5  | 2016 | 2.78 | 164.32  | 2 | 16.09 | 4.25 | 0.66 | 4902  | 1877 | 3639 | 3708 |
| 5  | 2017 | 2.78 | 164.32  | 2 | 16.09 | 4.25 | 0.66 | 4902  | 1877 | 3639 | 3708 |
| 5  | 2018 | 2.78 | 164.32  | 2 | 16.09 | 4.25 | 0.66 | 4902  | 1877 | 3639 | 3708 |
| 1  | 2013 | 7.34 | 527.64  | 2 | 5.07  | 8.29 | 1.56 | 11326 | 942  | 2367 | 2509 |
| 1  | 2014 | 3.85 | 527.64  | 2 | 5.07  | 8.29 | 1.56 | 11326 | 942  | 2367 | 2509 |
| 1  | 2015 | 3.77 | 366.64  | 2 | 5.07  | 8.29 | 1.56 | 11326 | 942  | 2367 | 2509 |
| 1  | 2016 | 3.91 | 366.64  | 2 | 5.07  | 8.29 | 1.56 | 11326 | 942  | 2367 | 2509 |
| 1  | 2017 | 3.84 | 366.64  | 2 | 5.07  | 8.29 | 1.56 | 11326 | 942  | 2367 | 2509 |
| 1  | 2018 | 3.64 | 366.64  | 2 | 5.07  | 8.29 | 1.56 | 11326 | 942  | 2367 | 2509 |
| 3  | 2013 | 5.73 | 1024.04 | 2 | 7.40  | 4.90 | 1.97 | 20267 | 924  | 1390 | 2140 |
| 3  | 2014 | 5.77 | 1024.04 | 2 | 7.40  | 4.90 | 1.97 | 20267 | 924  | 1390 | 2140 |
| 3  | 2015 | 5.11 | 1024.04 | 2 | 7.40  | 4.90 | 1.97 | 20267 | 924  | 1390 | 2140 |
| 3  | 2016 | 4.54 | 1024.04 | 2 | 7.40  | 4.90 | 1.97 | 20267 | 924  | 1390 | 2140 |
| 3  | 2017 | 5.00 | 1024.04 | 2 | 7.40  | 4.90 | 1.97 | 20267 | 924  | 1390 | 2140 |
| 3  | 2018 | 4.00 | 1024.04 | 2 | 7.40  | 4.90 | 1.97 | 20267 | 924  | 1390 | 2140 |
| 10 | 2013 | 0.00 | 900.45  | 1 | 0.00  | 0.00 | 0.67 | 0     | 2268 | 2525 | 4150 |
| 10 | 2014 | 0.00 | 900.45  | 1 | 0.00  | 0.00 | 0.67 | 0     | 2268 | 2525 | 4150 |
| 10 | 2015 | 0.00 | 900.45  | 1 | 0.00  | 0.00 | 0.67 | 0     | 2268 | 2525 | 4150 |
| 10 | 2016 | 0.00 | 900.45  | 1 | 0.00  | 0.00 | 0.67 | 0     | 2268 | 2525 | 4150 |
| 10 | 2017 | 0.00 | 900.45  | 1 | 0.00  | 0.00 | 0.67 | 0     | 2268 | 2525 | 4150 |
| 10 | 2018 | 0.00 | 900.45  | 1 | 0.00  | 0.00 | 0.67 | 0     | 2268 | 2525 | 4150 |
| 14 | 2013 | 0.00 | 851.03  | 1 | 0.00  | 0.00 | 0.01 | 0     | 2671 | 3999 | 5071 |
| 14 | 2014 | 0.00 | 851.03  | 1 | 0.00  | 0.00 | 0.01 | 0     | 2671 | 3999 | 5071 |
| 14 | 2015 | 0.00 | 851.03  | 1 | 0.00  | 0.00 | 0.01 | 0     | 2671 | 3999 | 5071 |
| 14 | 2016 | 0.00 | 851.03  | 1 | 0.00  | 0.00 | 0.01 | 0     | 2671 | 3999 | 5071 |

|    |      |        |         |   |       |       |      |       |      |      |      |
|----|------|--------|---------|---|-------|-------|------|-------|------|------|------|
| 14 | 2017 | 0.00   | 851.03  | 1 | 0.00  | 0.00  | 0.01 | 0     | 2671 | 3999 | 5071 |
| 14 | 2018 | 0.00   | 851.03  | 1 | 0.00  | 0.00  | 0.01 | 0     | 2671 | 3999 | 5071 |
| 11 | 2014 | 33.34  | 674.87  | 2 | 17.50 | 8.14  | 3.22 | 42530 | 21   | 67   | 87   |
| 11 | 2015 | 33.34  | 674.87  | 2 | 17.50 | 8.14  | 3.22 | 42530 | 21   | 67   | 87   |
| 11 | 2016 | 41.50  | 674.87  | 2 | 17.50 | 8.14  | 3.22 | 42530 | 21   | 67   | 87   |
| 11 | 2017 | 37.74  | 674.87  | 2 | 17.50 | 8.14  | 3.22 | 42530 | 21   | 67   | 87   |
| 11 | 2018 | 41.50  | 674.87  | 2 | 17.50 | 8.14  | 3.22 | 42530 | 21   | 67   | 87   |
| 13 | 2016 | 188.89 | 3840.54 | 2 | 15.93 | 11.00 | 2.55 | 18126 | 348  | 683  | 850  |
| 13 | 2017 | 180.00 | 3840.54 | 2 | 15.93 | 11.00 | 2.55 | 18126 | 348  | 683  | 850  |
| 13 | 2018 | 177.50 | 3840.54 | 2 | 15.93 | 11.00 | 2.55 | 18126 | 348  | 683  | 850  |
| 15 | 2014 | 12.00  | 1001.06 | 1 | 11.44 | 5.00  | 1.55 | 29    | 1549 | 1738 | 1826 |
| 16 | 2014 | 31.58  | 863.61  | 1 | 23.56 | 11.00 | 2.24 | 7767  | 356  | 1103 | 1312 |
| 17 | 2014 | 3.79   | 928.57  | 1 | 23.56 | 9.67  | 1.53 | 4521  | 1249 | 1747 | 2590 |
| 18 | 2014 | 2.67   | 180.52  | 2 | 16.92 | 4.00  | 2.35 | 28461 | 702  | 1110 | 1376 |
| 19 | 2014 | 3.50   | 1162.90 | 1 | 18.16 | 6.00  | 2.12 | 17923 | 884  | 1153 | 1631 |
| 20 | 2014 | 3.17   | 1115.70 | 1 | 10.55 | 9.00  | 1.15 | 4902  | 1996 | 2426 | 2601 |
| 21 | 2014 | 1.00   | 941.84  | 1 | 3.75  | 5.00  | 1.65 | 0     | 525  | 1605 | 2960 |
| 22 | 2015 | 14.55  | 1006.75 | 1 | 21.00 | 6.80  | 2.14 | 10731 | 725  | 1236 | 1313 |
| 23 | 2015 | 1.00   | 143.88  | 1 | 3.44  | 3.00  | 0.01 | 0     | 5933 | 6738 | 7230 |
| 9  | 2015 | 16.90  | 1001.11 | 1 | 17.57 | 7.00  | 2.64 | 46620 | 631  | 631  | 1567 |
| 24 | 2015 | 2.82   | 608.64  | 1 | 6.50  | 5.00  | 2.38 | 1342  | 233  | 508  | 1149 |
| 25 | 2015 | 0.00   | 1159.11 | 1 | 3.25  | 7.00  | 1.05 | 0     | 2037 | 2037 | 3209 |
| 26 | 2015 | 0.00   | 911.90  | 1 | 7.00  | 0.00  | 1.88 | 0     | 665  | 1408 | 1860 |
| 8  | 2015 | 12.50  | 1165.39 | 2 | 19.23 | 7.40  | 3.46 | 72904 | 0    | 144  | 476  |
| 27 | 2016 | 3.70   | 774.27  | 1 | 5.86  | 4.00  | 1.75 | 0     | 1002 | 1522 | 1895 |
| 12 | 2016 | 10.81  | 1074.66 | 1 | 20.34 | 6.80  | 1.54 | 4360  | 991  | 2150 | 2438 |
| 28 | 2016 | 2.50   | 794.84  | 1 | 1.50  | 4.00  | 1.57 | 3243  | 1294 | 1842 | 2121 |

## Appendix S1. Spatial analysis of Black kite density

### Methods

Because of potential spatial dependency, kite density was initially modelled through a spatial linear mixed model (LMM) by means of Bayesian methods, as detailed in Zuur et al. (2017). The model incorporated a Gaussian Markov random field that controls for spatial dependency and autocorrelation. The estimation of the spatial random field was based on the creation of a dense triangular grid (mesh) overlaid on the study area (Fig. 1 below) to solve a “continuous domain stochastic partial differential equation” (SPDE), in turn used to calculate the parameters of the Matérn correlation function which estimates the spatial random term. The explanatory variables (see Methods and Table S1) were fitted to the model through diffuse priors, and considered as “important” when their 25 % and 95 % credible intervals did not overlap zero. Study plot identity was always fitted as a random effect. Support for inclusion of a spatial random field was examined by comparing the LMM with and without the spatial field by means of the DIC statistic. Zuur et al. (2017) suggest a  $\Delta\text{DIC} > 10$  units to provide support for a model over another. All model building and checking procedures follow Zuur et al. (2017).

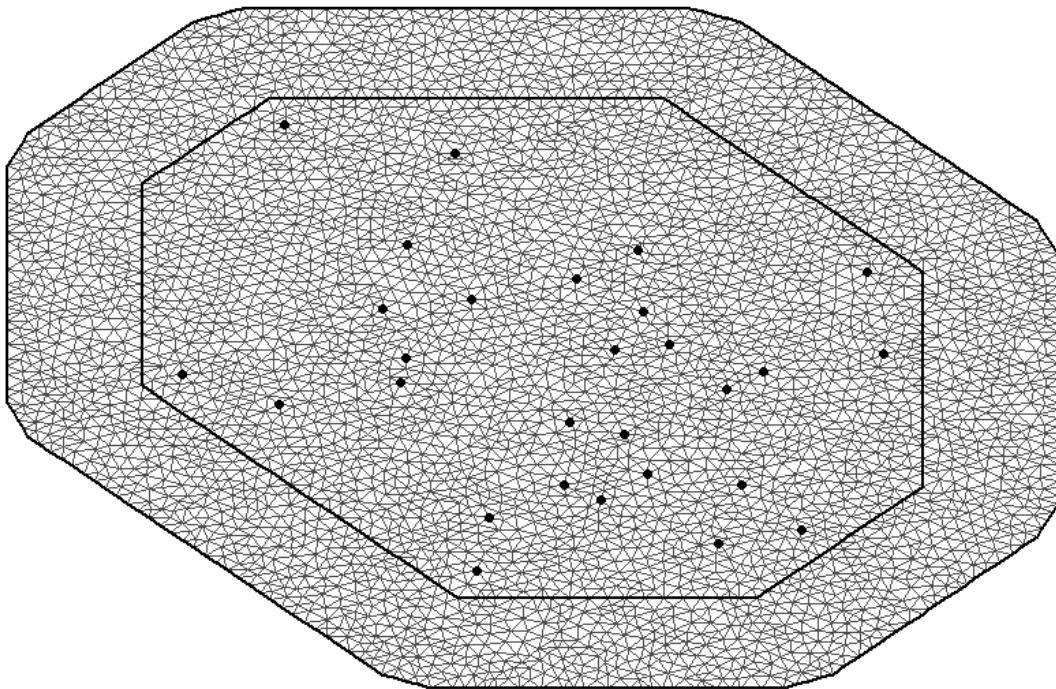

Fig. 1. Mesh overlaid on the Delhi study area to estimate the spatial field fitted to the linear mixed model used to relate kite density to explanatory variables. The mesh was based on a grid of  $> 4000$  triangle-vertices (4299), following recommendations by Zuur et al. (2017). The black circles represent the kite study plots.

### Results

Two variables appeared as important, as their 25 % and 95 % credible intervals did not overlap zero (see Table 1 below). These were: human density and the interaction between Access to Muslim subsidies and Nest availability. There was poor support for the need of a

spatial random field: the spatial model was only 2.78 DIC units less than the model without a spatial random field.

Table 1. Slope and credible intervals of a spatial linear mixed model testing the effect of landscape structure, food availability and breeding-site availability on the population density of an urban raptor. Important variables, whose credible intervals do not overlap zero, are highlighted in bold .

| Variable                                              | Mean         | 25 % credible interval | 95 % credible interval |
|-------------------------------------------------------|--------------|------------------------|------------------------|
| Intercept                                             | -15.33       | -44.63                 | 14.55                  |
| Access to Muslim subsidies                            | -3.40        | -27.08                 | 20.35                  |
| Quadratic effect of Access to Muslim subsidies        | -6.84        | -18.52                 | 4.87                   |
| Nest availability                                     | -0.01        | -0.04                  | 0.02                   |
| Hygiene score                                         | -1.27        | -4.53                  | 1.96                   |
| <b>Human density</b>                                  | <b>18.18</b> | <b>3.76</b>            | <b>32.23</b>           |
| Index of road density                                 | 1.04         | -1.64                  | 3.76                   |
| Access to Muslim subsidies * Hygiene score            | 0.87         | -0.99                  | 2.74                   |
| <b>Access to Muslim subsidies * Nest availability</b> | <b>0.01</b>  | <b>0.01</b>            | <b>0.03</b>            |
